# Supplementary material for: Autophagy is activated and involved in cell death with participation of cathepsins during stress-induced microspore embryogenesis in barley
Source: PubMed Central journal article supplement (PMC6019037; doi:10.1093/jxb/erx455), 2018-01-04
Supplement: erx455_suppl_supplementary_table_s1-s2.pdf [file erx455_suppl_supplementary_table_s1-s2.pdf]

**Table S1. Cathepsin-like protease amino acid sequences (peptides) used for specific antibody production.**

| <b>Barley proteases</b> | <b>Peptides</b>      |
|-------------------------|----------------------|
| HvPap-1                 | SGFAPSRFKEKPYWIIKN   |
| HvPap-6                 | IDSEEDYPYKERDNRC     |
| HvPap-19                | CQEKKHFSIDAYQVNSDPHD |

**Table S2. Primer sequences used for the amplification of barley genes by RT-qPCR assays.** *HvCycl* gene (cyclophilin), *HvPap-1* gene (cathepsin F-like protease) *HvPap-6* gene (cathepsin L-like protease), *HvPap-12* gene (cathepsin H-like protease), autophagy related genes *HvATG5* and *HvATG6*.

| Barley genes    | Primers sequence        |                        |
|-----------------|-------------------------|------------------------|
|                 | Forward                 | Reverse                |
| <i>HvCycl</i>   | TCCACCGGAGAGGAAGTACAGT  | AATGTGCTCAGAGATGCAAGGA |
| <i>HvPap-1</i>  | TCCTGGAGTCGATCTTTGGTTTC | CAAGCATACTGTTGCGGCTTC  |
| <i>HvPap-6</i>  | TGCAATTGACGGCAAGAAGA    | TGGATCACCAGGTGATCATTG  |
| <i>HvPap-12</i> | ATGTGCGCTATTGCTACCTGC   | CACCTTATTCATGTCTGGCGAA |
| <i>HvATG5</i>   | TGGGAATCAGTGAGGAAAGG    | CCAGGAGATTCAGGCTCATC   |
| <i>HvATG6</i>   | TGGTTTCTCACTTGCCTTCA    | AGCCTTTGTCCAGTTCTCCA   |
